# Supplementary material for: Expression analysis of the osteoarthritis genetic susceptibility locus mapping to an intron of the MCF2L gene and marked by the polymorphism rs11842874
Source: Springer Nature journal article supplement (doi:10.1186/s12881-015-0254-2), 2015-11-19
Supplement: MOESM3 [file 9741434]

**Additional File 3.** Ensembl *MCF2L* transcript variant names and Ensembl ID.

| <b>Ensembl transcript ID</b> | <b>Ensembl transcript name</b> |
|------------------------------|--------------------------------|
| MCF2L-001                    | ENST00000375608                |
| MCF2L-002                    | ENST00000397030                |
| MCF2L-003                    | ENST00000375597                |
| MCF2L-005                    | ENST00000535094                |
| MCF2L-007                    | ENST00000397021                |
| MCF2L-008                    | ENST00000473345                |
| MCF2L-010                    | ENST00000420013                |
| MCF2L-011                    | ENST00000413354                |
| MCF2L-012                    | ENST00000439475                |
| MCF2L-014                    | ENST00000441756                |
| MCF2L-015                    | ENST00000397036                |
| MCF2L-018                    | ENST00000397024                |
| MCF2L-019                    | ENST00000486806                |
| MCF2L-023                    | ENST00000423251                |
| MCF2L-024                    | ENST00000421756                |
| MCF2L-025                    | ENST00000433807                |
| MCF2L-029                    | ENST00000453297                |
| MCF2L-030                    | ENST00000409954                |
| MCF2L-033                    | ENST00000397017                |
| MCF2L-034                    | ENST00000261963                |
| MCF2L-201                    | ENST00000375604                |
