# Supplementary material for: Expression analysis of the osteoarthritis genetic susceptibility locus mapping to an intron of the MCF2L gene and marked by the polymorphism rs11842874
Source: Springer Nature journal article supplement (doi:10.1186/s12881-015-0254-2), 2015-11-19

**NPA**

**$\alpha$ -Dbs**

**Tonsil**

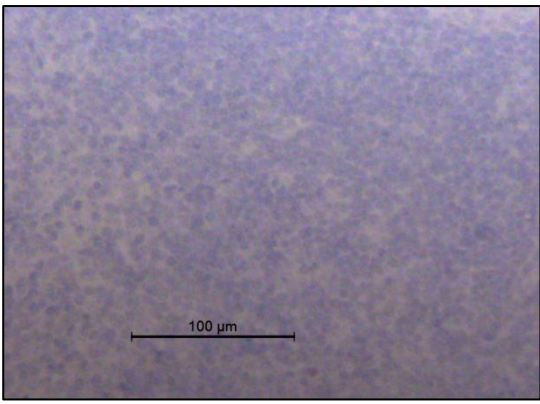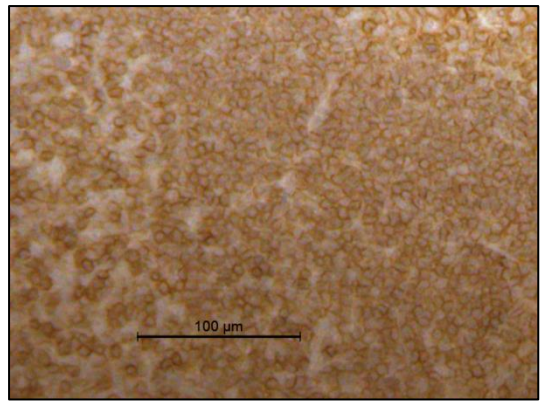

**Synovium**

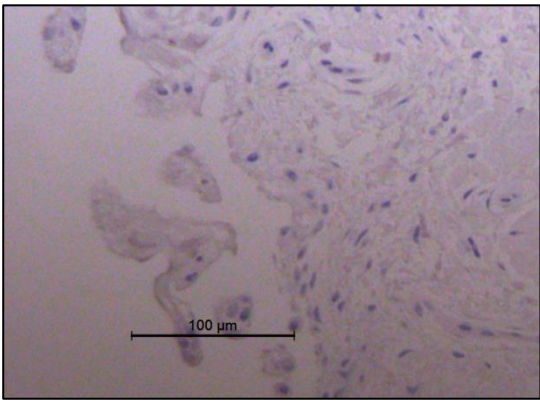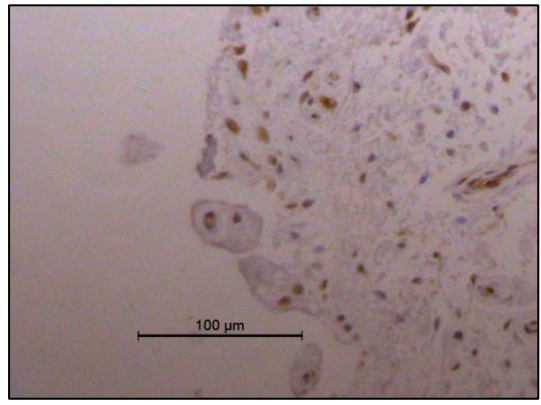

**Fat pad**

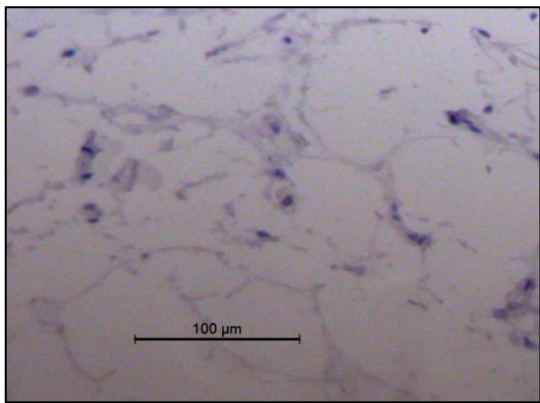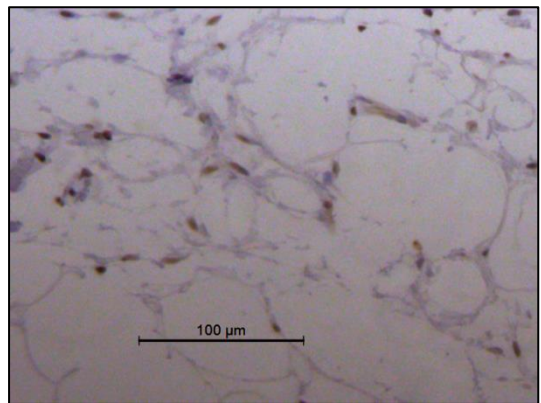

**Cartilage**

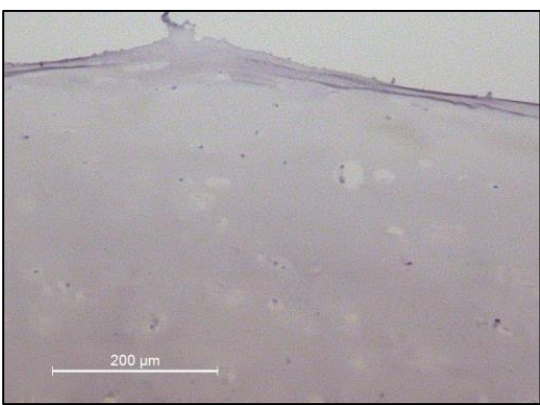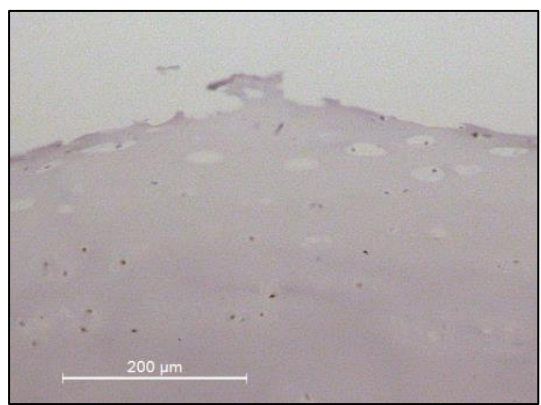

Supplement: MOESM4 [file 9741434]
