# Supplementary material for: Expression analysis of the osteoarthritis genetic susceptibility locus mapping to an intron of the MCF2L gene and marked by the polymorphism rs11842874
Source: Springer Nature journal article supplement (doi:10.1186/s12881-015-0254-2), 2015-11-19
Supplement: MOESM5 [file 9741434]

**Additional file 5. An eQTL that regulates *MCF2L* gene expression in skeletal muscle and oesophagus muscularis.** A search of the GTEx website identified an *MCF2L* eQTL operating in skeletal muscle and oesophagus muscularis. The eQTL is located in a 7 kb LD block containing ten SNPs in high LD ( $r^2 > 0.8$ ). It is approximately 42 kb downstream of the rs11842874 LD block and is in low LD with this block. The table lists the ten SNPs and their  $r^2$  and  $D'$  values relative to rs11842874. HG19 coordinates refer to human genome version 19.

| SNP       | Distance from rs11842874 (bp) | HG19 coordinates | Linkage disequilibrium with rs11842874 |       |
|-----------|-------------------------------|------------------|----------------------------------------|-------|
|           |                               |                  | $r^2$                                  | $D'$  |
| rs497724  | 41224                         | chr13:113694509  | 0.1                                    | 1     |
| rs527264  | 42034                         | chr13:113735733  | 0.1                                    | 1     |
| rs546818  | 45009                         | chr13:113739518  | 0.1                                    | 1     |
| rs487612  | 46769                         | chr13:113741278  | 0.1                                    | 1     |
| rs522511  | 42583                         | chr13:113737092  | 0.096                                  | 1     |
| rs522487  | 42590                         | chr13:113737099  | 0.096                                  | 1     |
| rs514181  | 47342                         | chr13:113741851  | 0.096                                  | 1     |
| rs498836  | 42876                         | chr13:113737385  | 0.093                                  | 1     |
| rs491455  | 43666                         | chr13:113738175  | 0.047                                  | 0.639 |
| rs1755693 | 44294                         | chr13:113738803  | 0.047                                  | 0.639 |
