# Supplementary material for: Expression analysis of the osteoarthritis genetic susceptibility locus mapping to an intron of the MCF2L gene and marked by the polymorphism rs11842874
Source: Springer Nature journal article supplement (doi:10.1186/s12881-015-0254-2), 2015-11-19
Supplement: MOESM6 [file 9741434]

**Additional File 6.** RegulomeDB bioinformatics database search of the SNPs in high LD with rs11842874. Detailed are the chromatin states around the SNPs in several types of joint-related cell from various origins. HG19 coordinates refer to the human genome version 19. Motif specifies any recognised transcription factor binding consensus sequences which incorporate the SNP.

| SNP         | Distance from rs11842874 (bp) | HG19 coordinates | Motif                               | Transcription factor binding | Chromatin state          |                                    |                                      |                                        |                                  |                         |
|-------------|-------------------------------|------------------|-------------------------------------|------------------------------|--------------------------|------------------------------------|--------------------------------------|----------------------------------------|----------------------------------|-------------------------|
|             |                               |                  |                                     |                              | Osteoblast primary cells | Adipose derived MSC cultured cells | MSC derived adipocyte cultured cells | MSC derived chondrocyte cultured cells | Bone marrow derived cultured MSC | H1 derived MSCs         |
| rs75351348  | 8821                          | chr13:113685688  | No data                             | No data                      | Weak repressed polycomb  | Repressed polycomb                 | Weak repressed polycomb              | Repressed polycomb                     | Weak repressed polycomb          | Weak repressed polycomb |
| rs118021693 | 5763                          | chr13:113688746  | No data                             | No data                      | No data                  | No data                            | No data                              | No data                                | No data                          | No data                 |
| rs76623552  | 2963                          | chr13:113691546  | No data                             | No data                      | Weak repressed polycomb  | Weak repressed polycomb            | Quiescent/low                        | Weak repressed polycomb                | Weak repressed polycomb          | Weak repressed polycomb |
| rs11842874  | 0                             | chr13:113694509  | No data                             | No data                      | Repressed polycomb       | Weak repressed polycomb            | Weak repressed polycomb              | Repressed polycomb                     | Repressed polycomb               | Repressed polycomb      |
| rs1888227   | 720                           | chr13:113695229  | RREB-1                              | No data                      | Repressed polycomb       | Enhancers                          | Enhancers                            | Weak repressed polycomb                | Repressed polycomb               | Repressed polycomb      |
| rs113120232 | 1271                          | chr13:113695780  | Pax-4 Pax-5 SP1                     | USF1 USF2 MAX                | Weak repressed polycomb  | Enhancers                          | Enhancers                            | Weak repressed polycomb                | Weak repressed polycomb          | Weak repressed polycomb |
| rs79866171  | 2546                          | chr13:113697055  | PPARdirectrepeat1 COUPdirectrepeat1 | No data                      | Weak repressed polycomb  | Weak repressed polycomb            | Weak repressed polycomb              | Repressed polycomb                     | Repressed polycomb               | Repressed polycomb      |
